# Supplementary material for: Effects of County-Level Opioid Dispensing Rates on Individual-Level Patterns of Prescription Opioid and Heroin Consumption: Evidence From National U.S. Data
Source: Atypon-hosted journal article supplement (doi:10.1176/appi.ajp.2021.21060602), 2021-12-08
Supplement: appi.ajp.2021.21060602.ds001.pdf [file appi.ajp.2021.21060602.ds001.pdf]

Data supplement for Vuolo and Kelly, Effects of County-Level Opioid Dispensing Rates on Individual-Level Patterns of Prescription Opioid and Heroin Consumption: Evidence From National U.S. Data. Am J Psychiatry (doi: 10.1176/appi.ajp.2021.21060602)

**TABLE S1. Fixed-effects models for individual-level prescription opioid and heroin outcomes in the NSDUH from 2006-2016, odds ratios and 95% confidence intervals**

|                                             | Prescription opioids         |                                              |                           | Heroin                    |                                           |                         |
|---------------------------------------------|------------------------------|----------------------------------------------|---------------------------|---------------------------|-------------------------------------------|-------------------------|
|                                             | Model 1:<br>Past year misuse | Model 2:<br>Frequency of past<br>year misuse | Model 3:<br>Dependence    | Model 4:<br>Past year use | Model 5:<br>Frequency of<br>past year use | Model 6:<br>Dependence  |
| County-level Opioid Dispensing Rate per 100 | 1.002***<br>(1.001,1.002)    | 1.001**<br>(1.001,1.002)                     | 1.003***<br>(1.001,1.004) | 0.999<br>(0.996,1.001)    | 0.998<br>(0.994,1.002)                    | 0.999<br>(0.996,1.003)  |
| <i>State-Level Policy Covariates</i>        |                              |                                              |                           |                           |                                           |                         |
| Prescription Drug Monitoring Program        | 1.037<br>(0.962,1.118)       | 1.058<br>(0.974,1.150)                       | 0.949<br>(0.764,1.178)    | 1.019<br>(0.746,1.393)    | 1.257<br>(0.784,2.015)                    | 1.055<br>(0.678,1.641)  |
| Good Samaritan Policy                       | 1.016<br>(0.956,1.081)       | 1.005<br>(0.928,1.089)                       | 1.009<br>(0.843,1.207)    | 0.746*<br>(0.596,0.935)   | 0.925<br>(0.657,1.303)                    | 0.671*<br>(0.492,0.916) |
| Any Naloxone Access Expansion               | 0.961<br>(0.898,1.029)       | 0.952<br>(0.876,1.035)                       | 0.843<br>(0.704,1.010)    | 1.158<br>(0.901,1.488)    | 0.955<br>(0.625,1.461)                    | 1.224<br>(0.849,1.766)  |
| Pain Management Clinic laws                 | 0.998<br>(0.931,1.071)       | 0.990<br>(0.909,1.079)                       | 0.938<br>(0.778,1.131)    | 1.176<br>(0.878,1.576)    | 1.324<br>(0.839,2.087)                    | 1.244<br>(0.806,1.920)  |
| Medical Marijuana Laws                      | 1.020<br>(0.949,1.097)       | 1.011<br>(0.924,1.107)                       | 0.998<br>(0.804,1.238)    | 1.102<br>(0.839,1.448)    | 1.014<br>(0.681,1.511)                    | 1.015<br>(0.745,1.384)  |
| <i>County-Level Covariates</i>              |                              |                                              |                           |                           |                                           |                         |
| Percent Hispanic                            | 0.997<br>(0.994,1.000)       | 0.997<br>(0.993,1.000)                       | 1.000<br>(0.992,1.008)    | 1.014<br>(0.995,1.034)    | 1.016<br>(0.994,1.039)                    | 1.009<br>(0.986,1.032)  |
| Percent Black                               | 1.002<br>(0.998,1.005)       | 1.001<br>(0.996,1.005)                       | 1.006<br>(0.996,1.016)    | 1.006<br>(0.990,1.023)    | 0.991<br>(0.972,1.011)                    | 1.002<br>(0.985,1.019)  |
| Percent Unemployed                          | 1.045***<br>(1.021,1.070)    | 1.060***<br>(1.030,1.091)                    | 1.029<br>(0.969,1.092)    | 1.086<br>(0.990,1.191)    | 1.216**<br>(1.079,1.370)                  | 1.079<br>(0.966,1.206)  |
| Percent Living in Poverty                   | 0.993<br>(0.980,1.006)       | 0.997<br>(0.983,1.011)                       | 1.003<br>(0.979,1.027)    | 0.947*<br>(0.906,0.990)   | 0.932*<br>(0.876,0.991)                   | 0.945*<br>(0.900,0.992) |
| Percent over 25 with a Bachelor's           | 1.009***<br>(1.004,1.014)    | 1.009***<br>(1.004,1.015)                    | 0.991<br>(0.981,1.002)    | 1.013<br>(0.997,1.030)    | 1.025*<br>(1.003,1.047)                   | 1.018<br>(0.998,1.039)  |
| Percent Foreign Born                        | 0.999<br>(0.994,1.003)       | 0.997<br>(0.992,1.002)                       | 1.003<br>(0.993,1.014)    | 0.986<br>(0.963,1.009)    | 0.983<br>(0.954,1.013)                    | 0.998<br>(0.974,1.022)  |

|                                       |                           |                           |                           |                           |                           |                           |
|---------------------------------------|---------------------------|---------------------------|---------------------------|---------------------------|---------------------------|---------------------------|
| Percent Female Headed Households      | 1.001<br>(0.977,1.025)    | 1.000<br>(0.974,1.028)    | 0.989<br>(0.933,1.049)    | 1.028<br>(0.945,1.119)    | 1.087<br>(0.961,1.229)    | 1.079<br>(0.980,1.188)    |
| Household Income (thousands)          | 0.999<br>(0.995,1.003)    | 1.000<br>(0.996,1.005)    | 1.008*<br>(1.000,1.017)   | 0.995<br>(0.980,1.009)    | 0.997<br>(0.975,1.018)    | 0.990<br>(0.974,1.005)    |
| Metropolitan Area (vs. Large central) |                           |                           |                           |                           |                           |                           |
| Large central                         | 0.953<br>(0.882,1.031)    | 0.944<br>(0.862,1.034)    | 0.961<br>(0.806,1.147)    | 0.780<br>(0.580,1.048)    | 0.927<br>(0.605,1.419)    | 0.899<br>(0.645,1.253)    |
| Medium                                | 0.955<br>(0.889,1.025)    | 0.959<br>(0.883,1.043)    | 0.960<br>(0.806,1.142)    | 0.821<br>(0.631,1.067)    | 0.974<br>(0.690,1.374)    | 0.684*<br>(0.497,0.941)   |
| Small                                 | 0.927<br>(0.851,1.010)    | 0.925<br>(0.837,1.021)    | 0.945<br>(0.776,1.152)    | 0.754<br>(0.519,1.095)    | 0.900<br>(0.565,1.433)    | 0.818<br>(0.498,1.343)    |
| Micropolitan                          | 0.869**<br>(0.792,0.955)  | 0.862**<br>(0.773,0.961)  | 0.849<br>(0.686,1.052)    | 0.636**<br>(0.451,0.897)  | 0.670<br>(0.438,1.026)    | 0.557**<br>(0.358,0.864)  |
| Noncore                               | 0.846**<br>(0.755,0.949)  | 0.815**<br>(0.713,0.931)  | 0.821<br>(0.604,1.117)    | 0.686<br>(0.441,1.067)    | 1.233<br>(0.705,2.156)    | 0.572*<br>(0.330,0.990)   |
| <i>Individual-Level Covariates</i>    |                           |                           |                           |                           |                           |                           |
| Female (vs. Male)                     | 0.815***<br>(0.788,0.843) | 0.814***<br>(0.782,0.847) | 0.749***<br>(0.680,0.825) | 0.509***<br>(0.447,0.579) | 0.478***<br>(0.390,0.586) | 0.530***<br>(0.442,0.636) |
| Health Insurance                      | 0.774***<br>(0.737,0.813) | 0.749***<br>(0.711,0.789) | 0.696***<br>(0.625,0.776) | 0.578***<br>(0.499,0.669) | 0.532***<br>(0.418,0.677) | 0.543***<br>(0.448,0.658) |
| U.S. Born                             | 1.717***<br>(1.597,1.846) | 1.889***<br>(1.736,2.055) | 3.434***<br>(2.659,4.435) | 3.337***<br>(2.045,5.443) | 2.514*<br>(1.118,5.651)   | 3.860***<br>(1.971,7.562) |
| Race/Ethnicity (vs. White)            |                           |                           |                           |                           |                           |                           |
| Black                                 | 0.542***<br>(0.503,0.583) | 0.495***<br>(0.454,0.540) | 0.367***<br>(0.291,0.462) | 0.418***<br>(0.305,0.572) | 0.285***<br>(0.172,0.472) | 0.334***<br>(0.220,0.506) |
| Native American                       | 0.996<br>(0.845,1.174)    | 1.037<br>(0.854,1.258)    | 1.123<br>(0.711,1.773)    | 0.756<br>(0.419,1.366)    | 0.667<br>(0.338,1.315)    | 0.611<br>(0.280,1.337)    |
| Hawaiian Islander/Pacific Islander    | 0.777<br>(0.557,1.083)    | 0.767<br>(0.503,1.171)    | 0.750<br>(0.335,1.679)    | 0.757<br>(0.346,1.656)    | 0.690<br>(0.143,3.329)    | 0.609<br>(0.142,2.616)    |
| Asian                                 | 0.505***<br>(0.449,0.567) | 0.496***<br>(0.434,0.567) | 0.422***<br>(0.283,0.627) | 0.136***<br>(0.063,0.290) | 0.206***<br>(0.087,0.489) | 0.033***<br>(0.007,0.154) |
| Multi-racial                          | 1.000<br>(0.898,1.113)    | 0.923<br>(0.804,1.058)    | 0.877<br>(0.698,1.101)    | 0.725<br>(0.465,1.129)    | 0.843<br>(0.484,1.467)    | 0.706<br>(0.379,1.312)    |
| Hispanic                              | 0.693***<br>(0.656,0.733) | 0.654***<br>(0.611,0.700) | 0.495***<br>(0.401,0.610) | 0.615**<br>(0.450,0.840)  | 0.443**<br>(0.261,0.750)  | 0.654*<br>(0.467,0.916)   |

|                                            |                           |                           |                           |                           |                           |                           |
|--------------------------------------------|---------------------------|---------------------------|---------------------------|---------------------------|---------------------------|---------------------------|
| Income bracket (vs. <20k)                  |                           |                           |                           |                           |                           |                           |
| 20k-49.9k                                  | 0.909***<br>(0.874,0.946) | 0.917***<br>(0.874,0.963) | 0.904<br>(0.808,1.011)    | 0.732***<br>(0.621,0.863) | 0.820<br>(0.613,1.097)    | 0.647***<br>(0.509,0.822) |
| 50k-74.9k                                  | 0.823***<br>(0.784,0.864) | 0.842***<br>(0.795,0.891) | 0.768***<br>(0.668,0.882) | 0.605***<br>(0.470,0.779) | 0.541***<br>(0.383,0.762) | 0.594***<br>(0.436,0.808) |
| 75k-99.9k                                  | 0.759***<br>(0.712,0.808) | 0.797***<br>(0.742,0.856) | 0.704***<br>(0.591,0.840) | 0.574***<br>(0.438,0.751) | 0.540**<br>(0.368,0.792)  | 0.562**<br>(0.398,0.793)  |
| >100k                                      | 0.757***<br>(0.716,0.800) | 0.764***<br>(0.715,0.817) | 0.795**<br>(0.680,0.930)  | 0.729*<br>(0.565,0.942)   | 0.712<br>(0.495,1.025)    | 0.653**<br>(0.479,0.890)  |
| Educational Attainment (vs. < High School) |                           |                           |                           |                           |                           |                           |
| High School degree                         | 0.823***<br>(0.781,0.868) | 0.823***<br>(0.776,0.873) | 0.778***<br>(0.682,0.888) | 0.693***<br>(0.584,0.824) | 0.702*<br>(0.534,0.924)   | 0.739**<br>(0.595,0.917)  |
| Some College                               | 0.856***<br>(0.810,0.905) | 0.866***<br>(0.813,0.921) | 0.720***<br>(0.630,0.822) | 0.676***<br>(0.556,0.823) | 0.757*<br>(0.575,0.997)   | 0.763*<br>(0.595,0.978)   |
| BA/BS+                                     | 0.609***<br>(0.569,0.651) | 0.609***<br>(0.564,0.658) | 0.322***<br>(0.266,0.390) | 0.193***<br>(0.126,0.294) | 0.274***<br>(0.157,0.479) | 0.182***<br>(0.112,0.296) |
| 12-17 year-olds                            | 0.522***<br>(0.485,0.560) | 0.464***<br>(0.428,0.504) | 0.506***<br>(0.418,0.612) | 0.298***<br>(0.219,0.408) | 0.258***<br>(0.172,0.387) | 0.154***<br>(0.091,0.258) |
| Employment Status (vs. Full-time)          |                           |                           |                           |                           |                           |                           |
| Part-time                                  | 1.021<br>(0.971,1.074)    | 0.996<br>(0.935,1.061)    | 1.136<br>(0.977,1.321)    | 1.380**<br>(1.111,1.714)  | 1.354<br>(0.999,1.835)    | 1.180<br>(0.886,1.573)    |
| Unemployed                                 | 1.297***<br>(1.215,1.384) | 1.259***<br>(1.161,1.365) | 1.882***<br>(1.634,2.168) | 2.891***<br>(2.330,3.589) | 2.046***<br>(1.527,2.741) | 2.948***<br>(2.322,3.743) |
| Other/Not in labor force                   | 1.044<br>(0.987,1.104)    | 1.007<br>(0.942,1.076)    | 1.735***<br>(1.510,1.993) | 2.117***<br>(1.703,2.631) | 1.763***<br>(1.281,2.426) | 2.321***<br>(1.764,3.054) |
| Marital status (vs. Married)               |                           |                           |                           |                           |                           |                           |
| Widowed                                    | 1.630***<br>(1.396,1.903) | 1.469***<br>(1.173,1.839) | 2.554***<br>(1.760,3.706) | 4.833***<br>(2.856,8.177) | 3.040*<br>(1.216,7.600)   | 3.583***<br>(1.689,7.603) |
| Divorced/Separated                         | 1.523***<br>(1.426,1.626) | 1.529***<br>(1.416,1.650) | 1.986***<br>(1.666,2.367) | 3.132***<br>(2.282,4.297) | 3.664***<br>(2.282,5.882) | 2.850***<br>(1.916,4.238) |
| Never married                              | 1.706***<br>(1.619,1.797) | 1.728***<br>(1.626,1.836) | 2.031***<br>(1.745,2.364) | 4.211***<br>(3.170,5.593) | 4.390***<br>(2.960,6.511) | 4.544***<br>(3.067,6.731) |

Note: \* $p < .05$ ; \*\* $p < .01$ ; \*\*\* $p < .001$ . Exponentiated coefficients from logistic regression displayed (binary for past year misuse/use and dependence; ordinal for frequency); 95% confidence intervals in parentheses. All models include state and year fixed-effects, cluster-corrected standard errors for county, cohort effects measured by birth year (squared), and utilize sampling weights.
