# Supplementary material for: Effects of County-Level Opioid Dispensing Rates on Individual-Level Patterns of Prescription Opioid and Heroin Consumption: Evidence From National U.S. Data
Source: Atypon-hosted journal article supplement (doi:10.1176/appi.ajp.2021.21060602), 2021-12-08
Supplement: appi.ajp.2021.21060602.ds001.pdf [file appi.ajp.2021.21060602.ds001.pdf]

 


Psychiatry Online
